# Supplementary material for: Natural Selection in the Great Apes
Source: PubMed Central journal article supplement — Mol Biol Evol. 2016 Nov 4;33(12):3268–83. doi: 10.1093/molbev/msw215 (PMC5100057; doi:10.1093/molbev/msw215), 2016-11-04
Supplement: supp_msw215_Cagan_S7_S15.pdf [file supp_msw215_Cagan_S7_S15.pdf]

Gorilla Functional windows

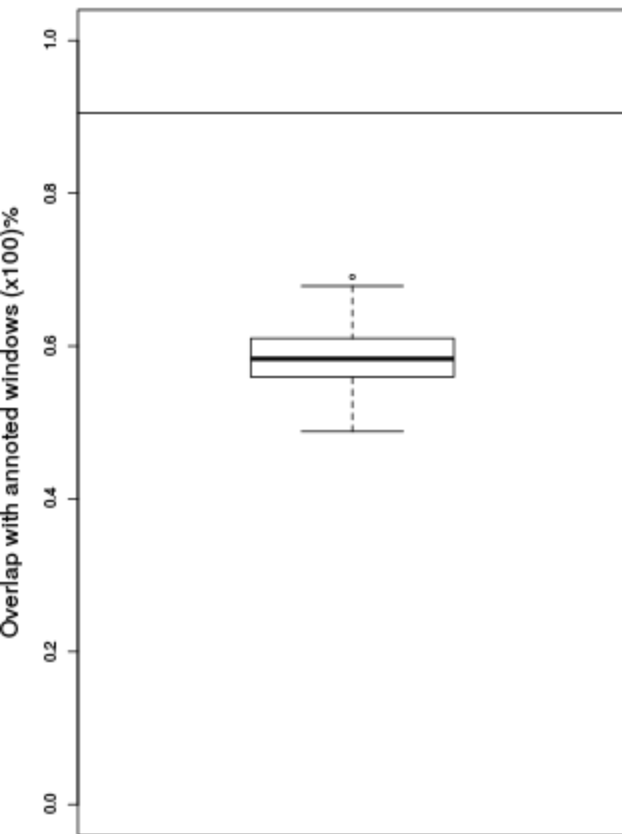

p-value= 0

Gorilla Protein coding windows

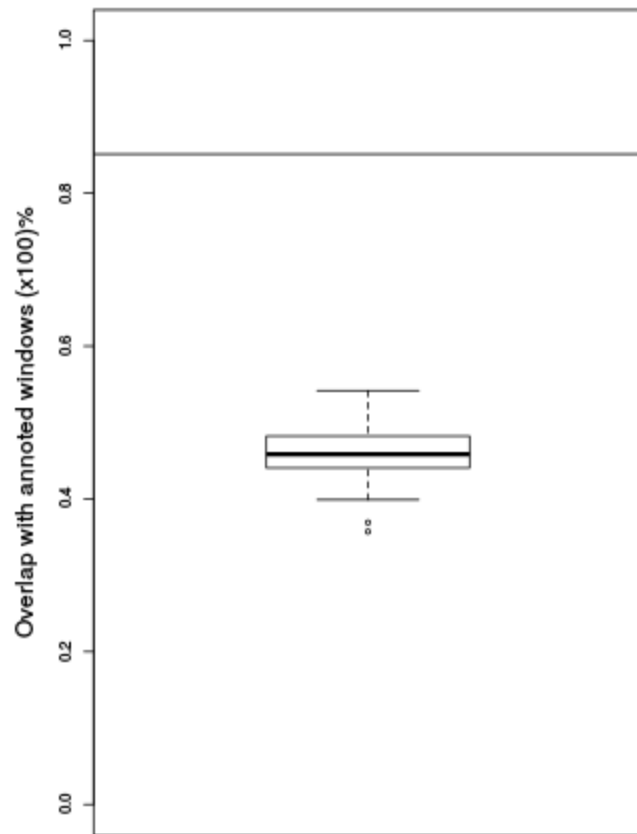

p-value= 0

Gorilla Non protein coding windows

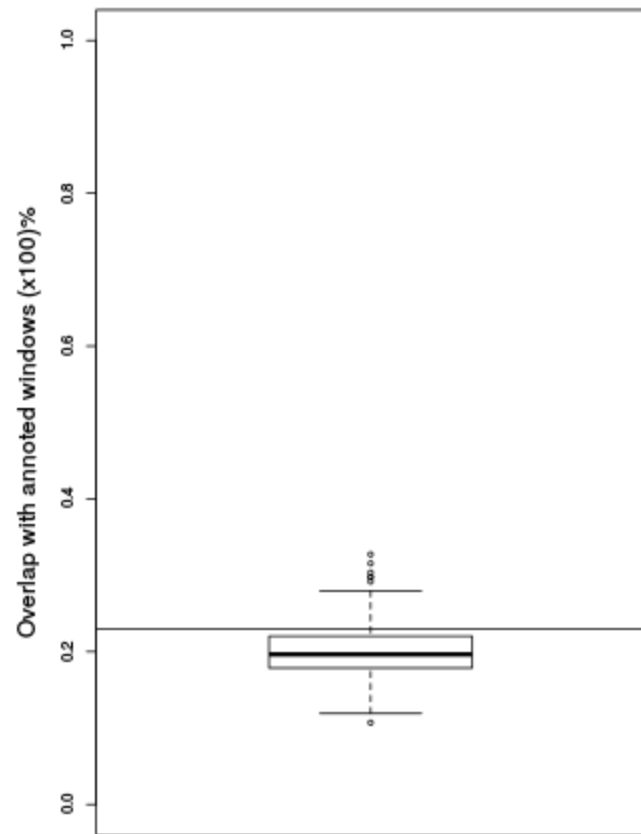

p-value= 0.1561

Homo Functional windows

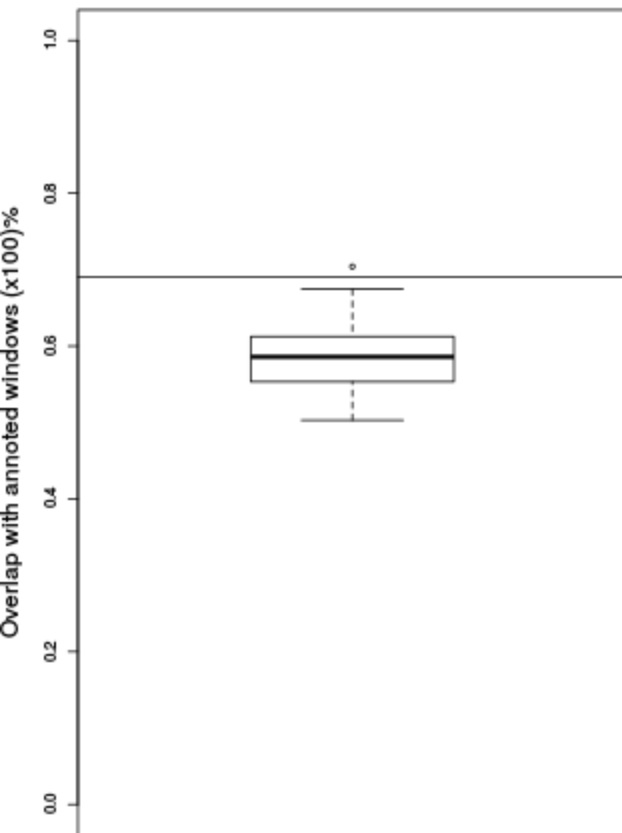

p-value= 0.00

Homo Protein coding windows

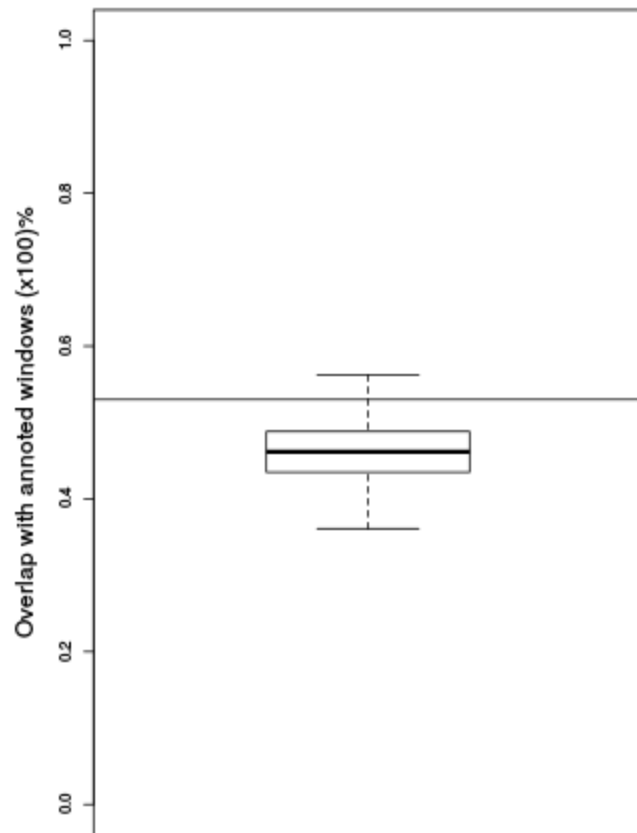

p-value= 0.02

Homo Non protein coding windows

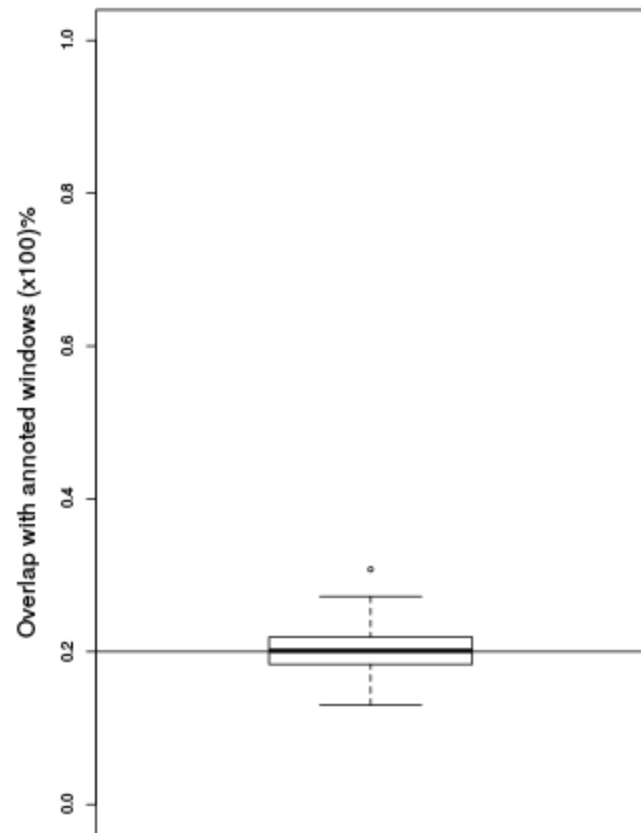

p-value= 0.5149

Pan\_paniscus Functional windows

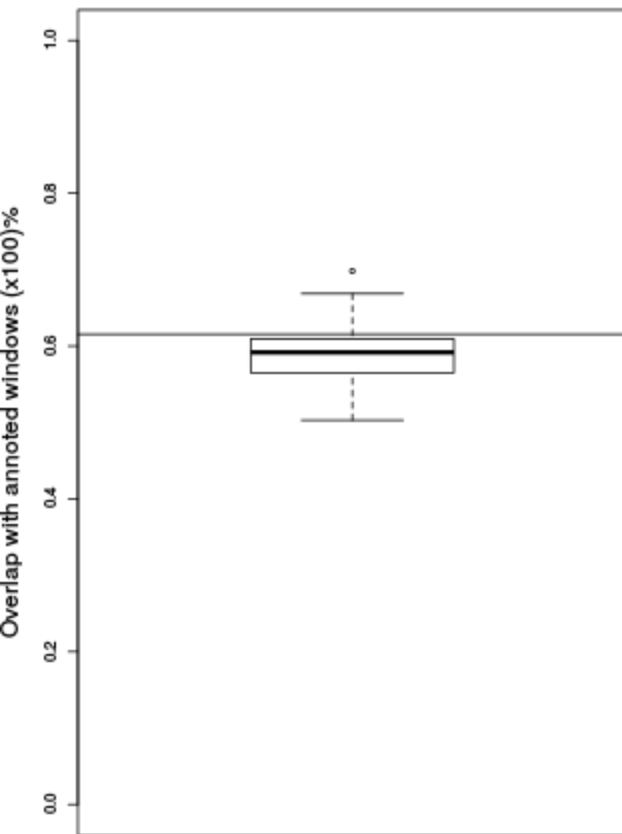

p-value= 0.20

Pan\_paniscus Protein coding windows

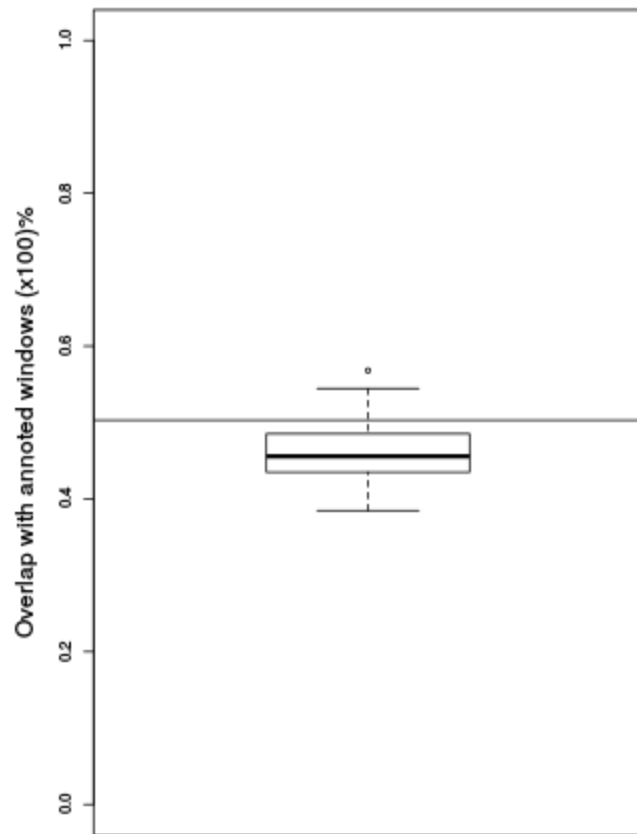

p-value= 0.15

Pan\_paniscus Non protein coding windows

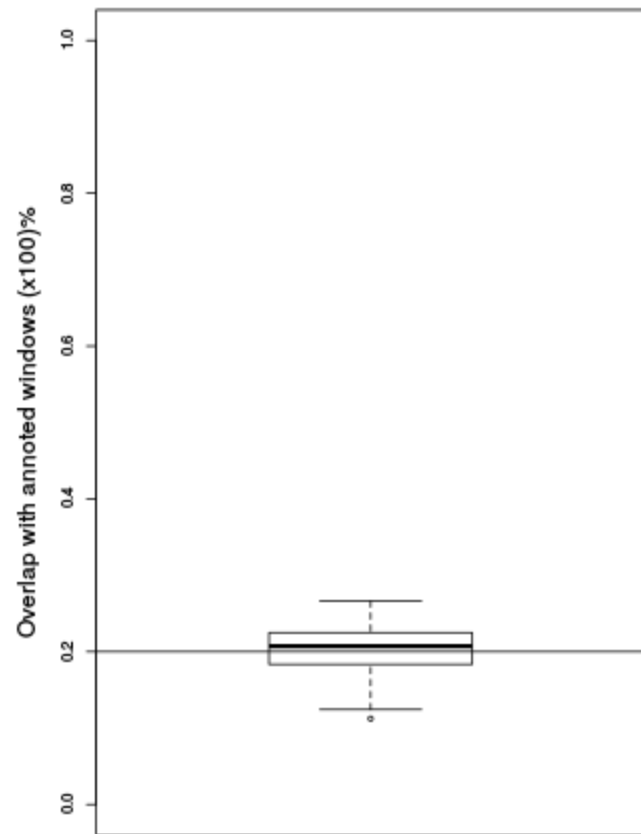

p-value= 0.604

Pan\_troglodytes\_elliotti Functional windows

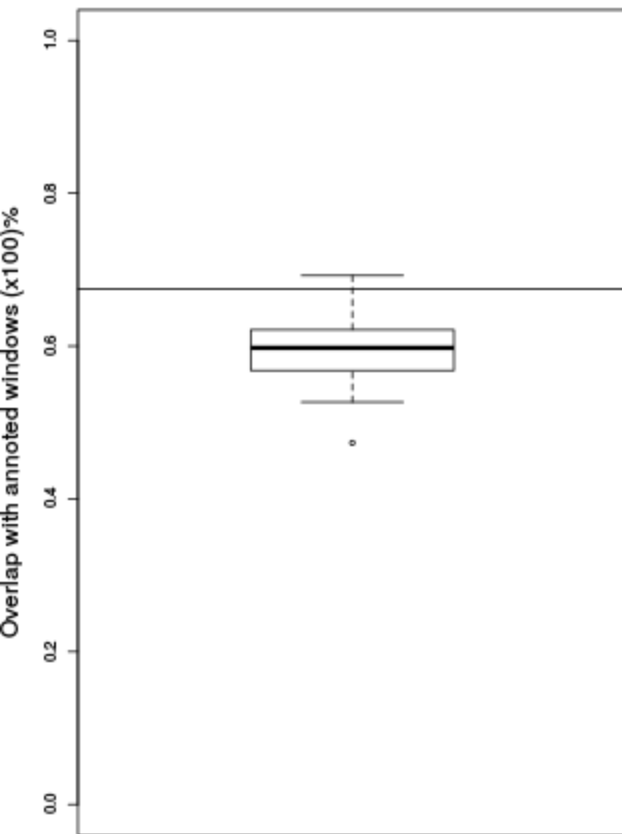

p-value= 0.01

Pan\_troglodytes\_elliotti Protein coding windows

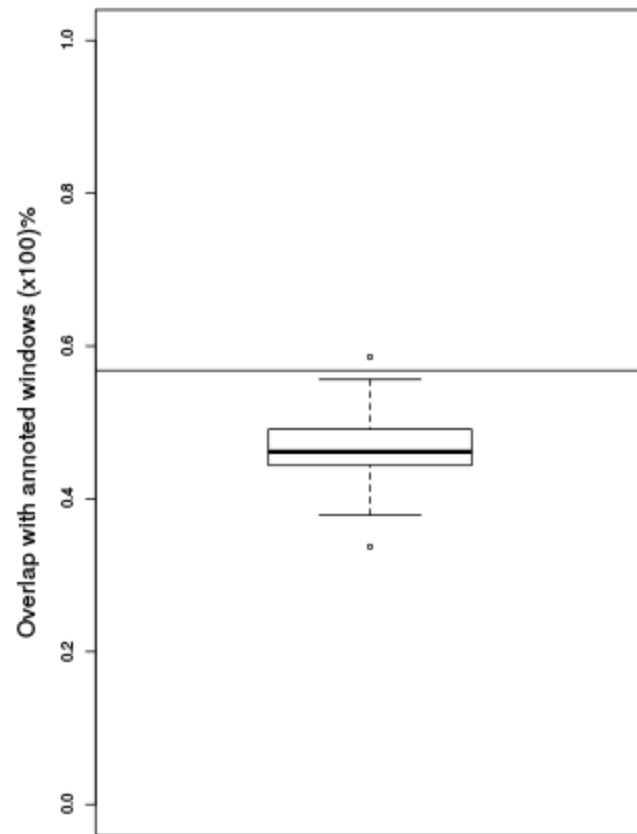

p-value= 0.00

Pan\_troglodytes\_elliotti Non protein coding windows

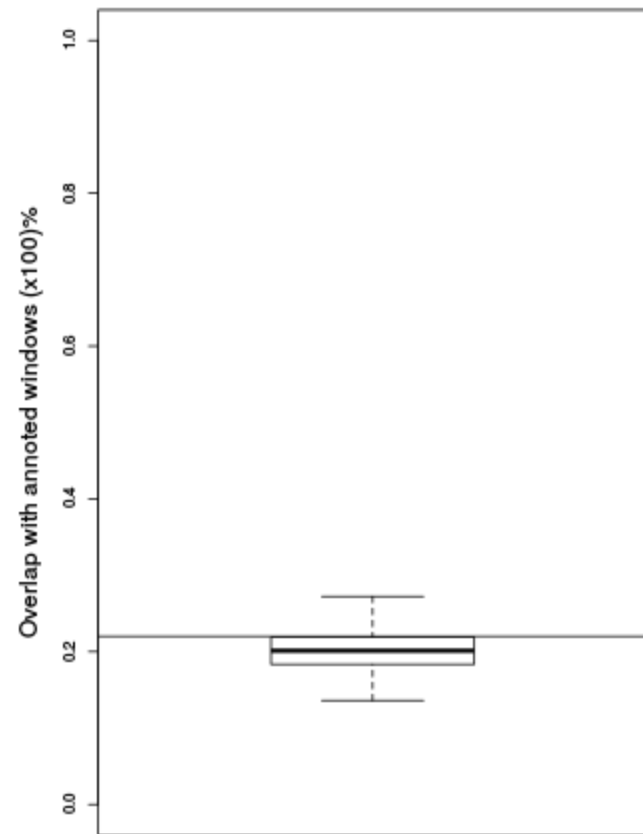

p-value= 0.2277

Pan\_troglodytes\_schweinfurthii Functional windows

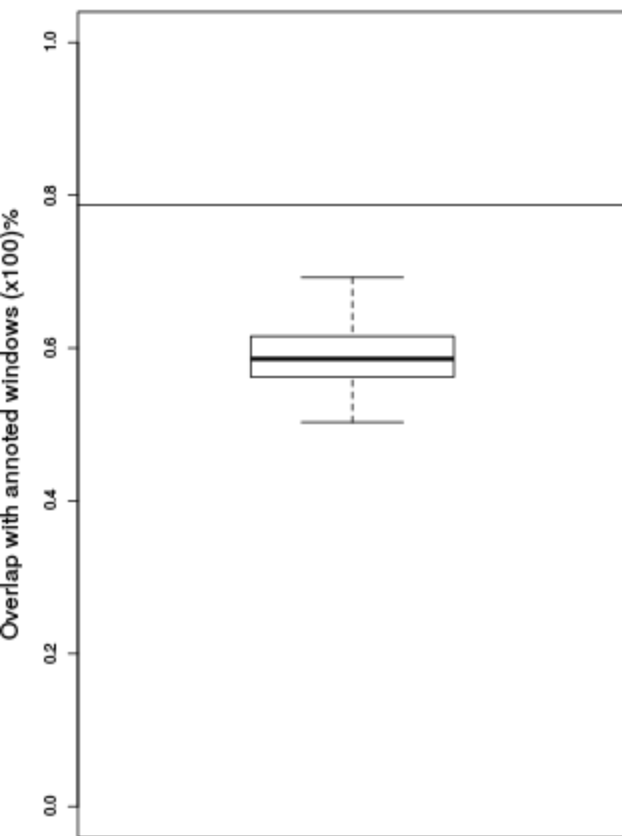

p-value= 0

Pan\_troglodytes\_schweinfurthii Protein coding windows

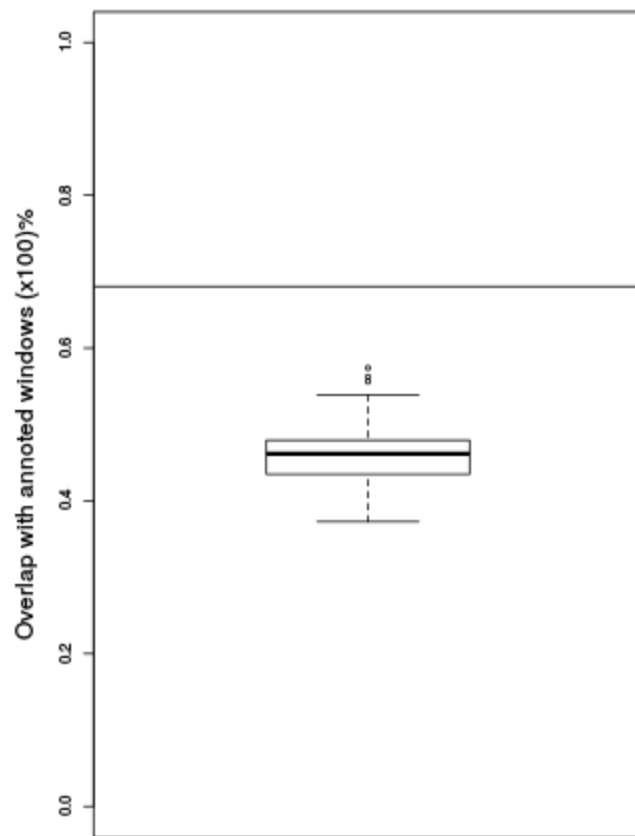

p-value= 0

Pan\_troglodytes\_schweinfurthii Non protein coding windows

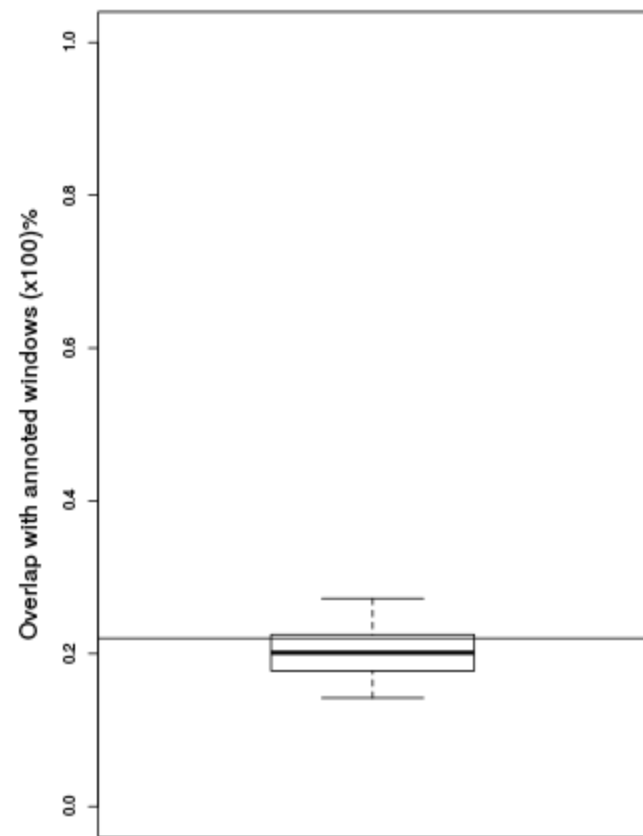

p-value= 0.2475

Pan\_troglodytes\_troglodytes Functional windows

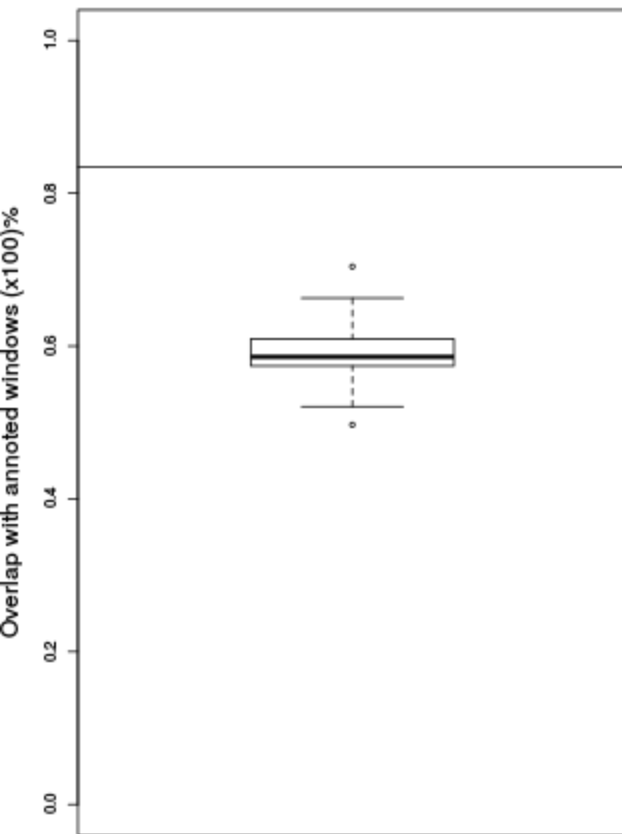

p-value= 0

Pan\_troglodytes\_troglodytes Protein coding windows

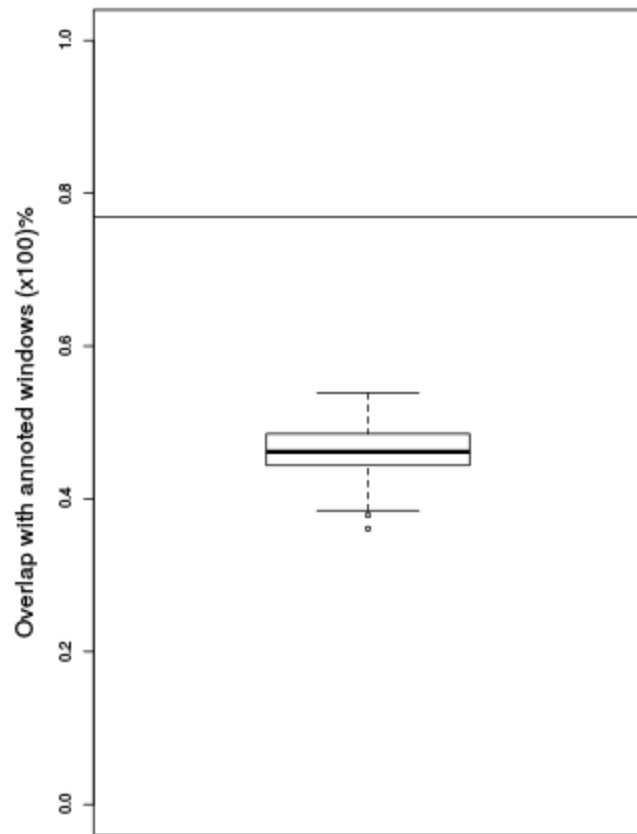

p-value= 0

Pan\_troglodytes\_troglodytes Non protein coding windows

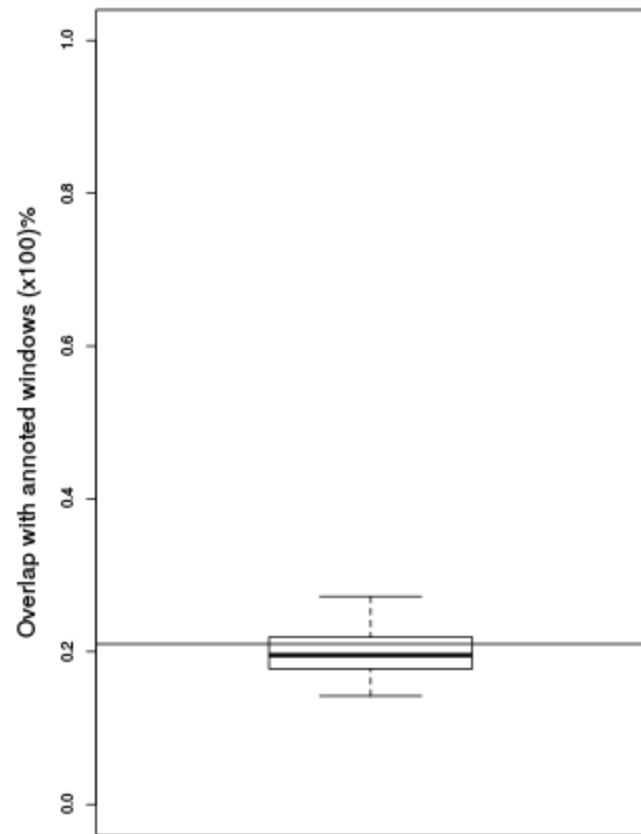

p-value= 0.3168

Pan\_troglodytes\_verus Functional windows

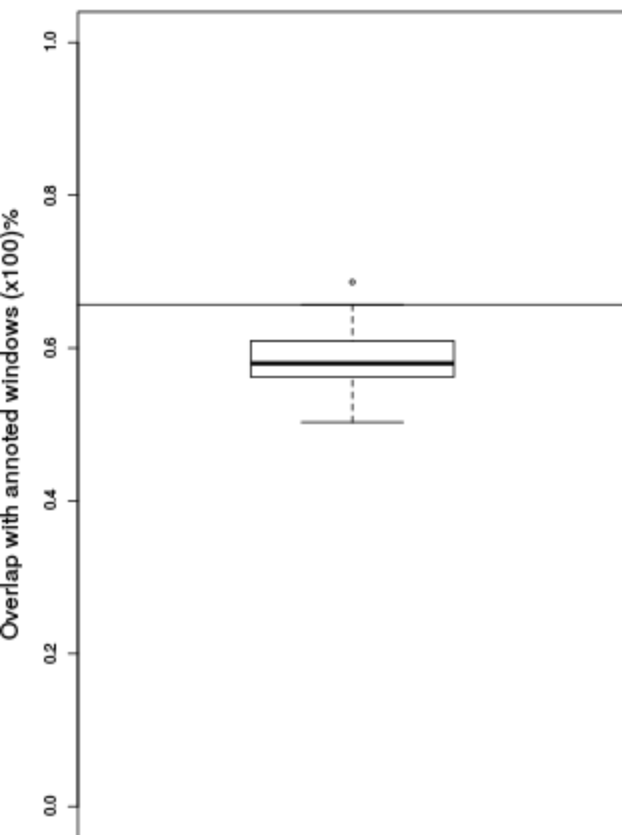

p-value= 0.00

Pan\_troglodytes\_verus Protein coding windows

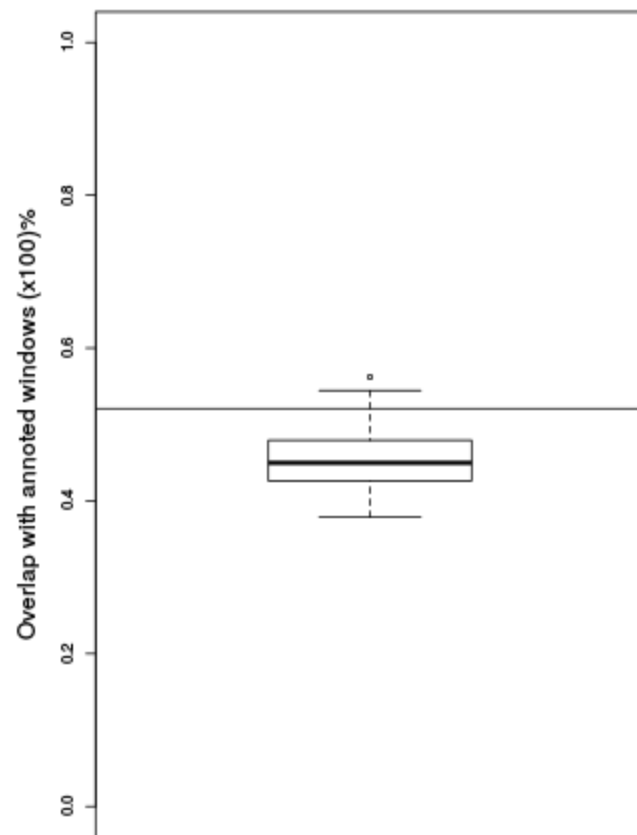

p-value= 0.06

Pan\_troglodytes\_verus Non protein coding windows

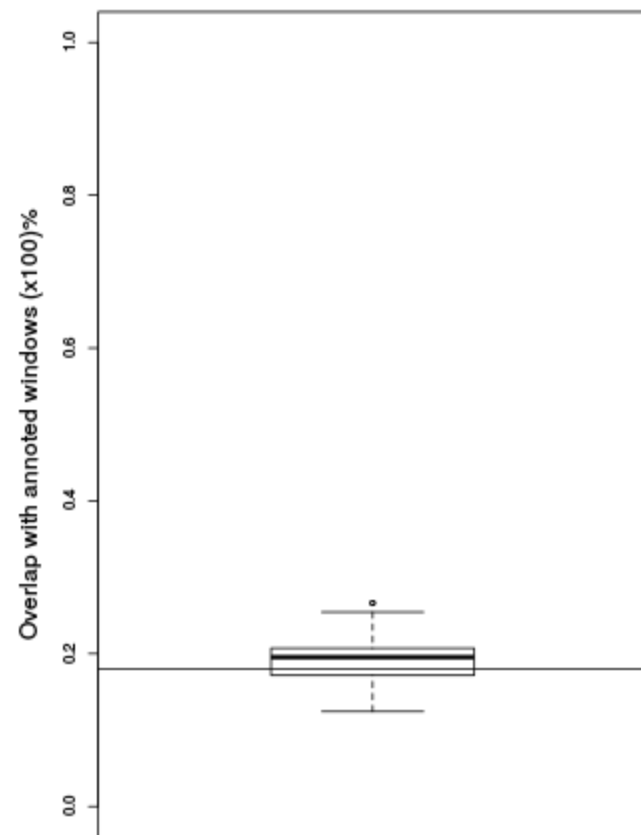

p-value= 0.6832

Pongo\_abelii Functional windows

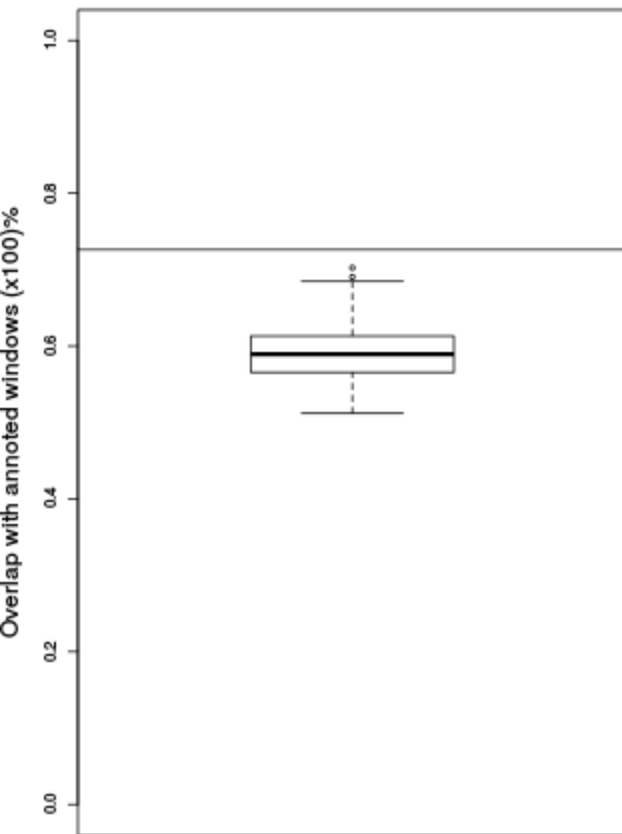

p-value= 0

Pongo\_abelii Protein coding windows

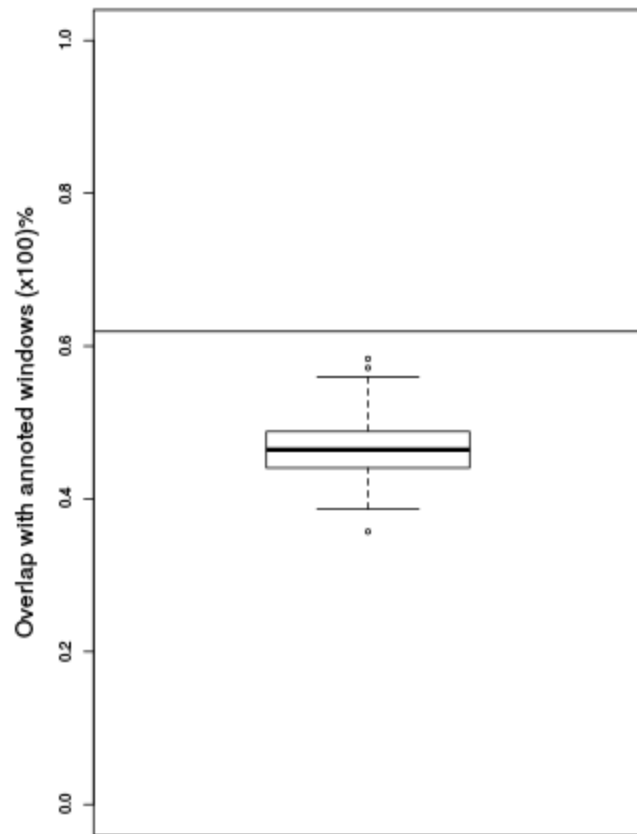

p-value= 0

Pongo\_abelii Non protein coding windows

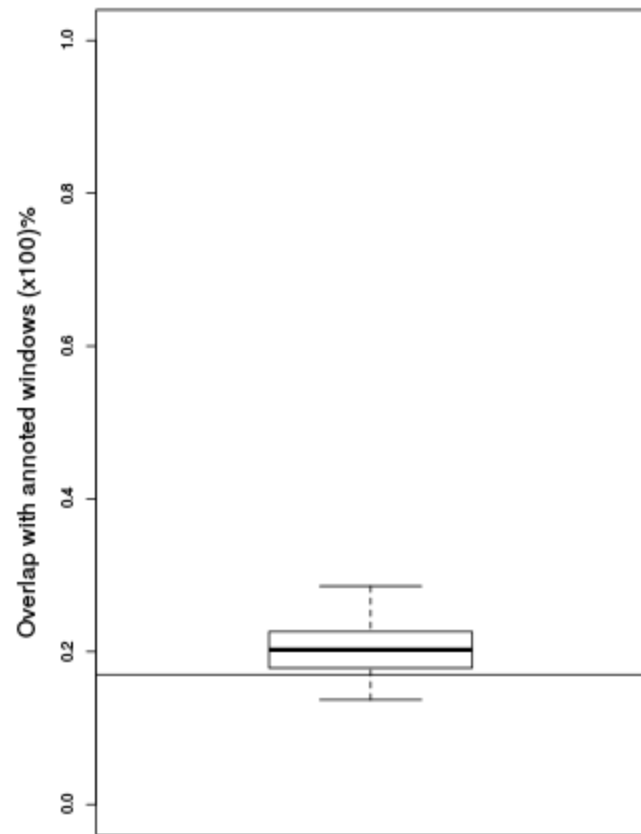

p-value= 0.802



Pongo\_pygmaeus Functional windows

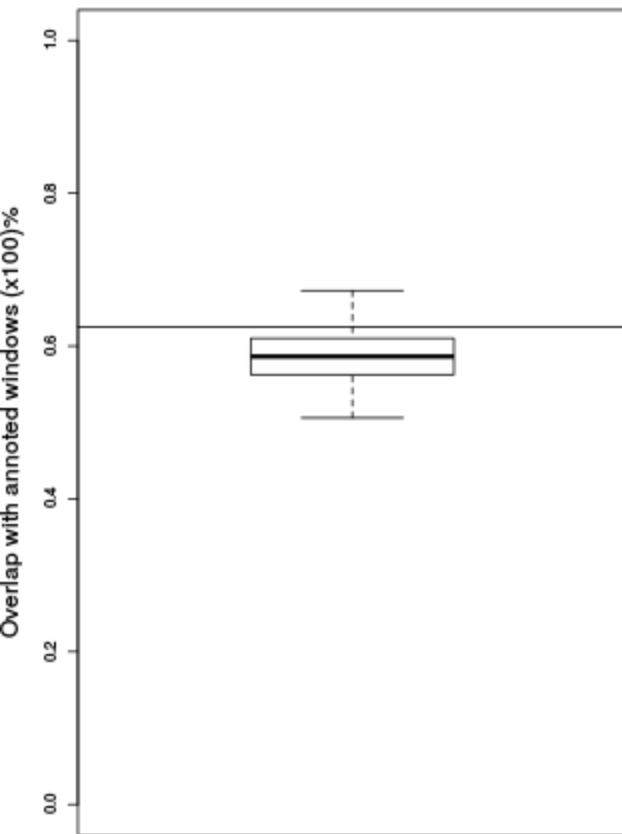

p-value= 0.11

Pongo\_pygmaeus Protein coding windows

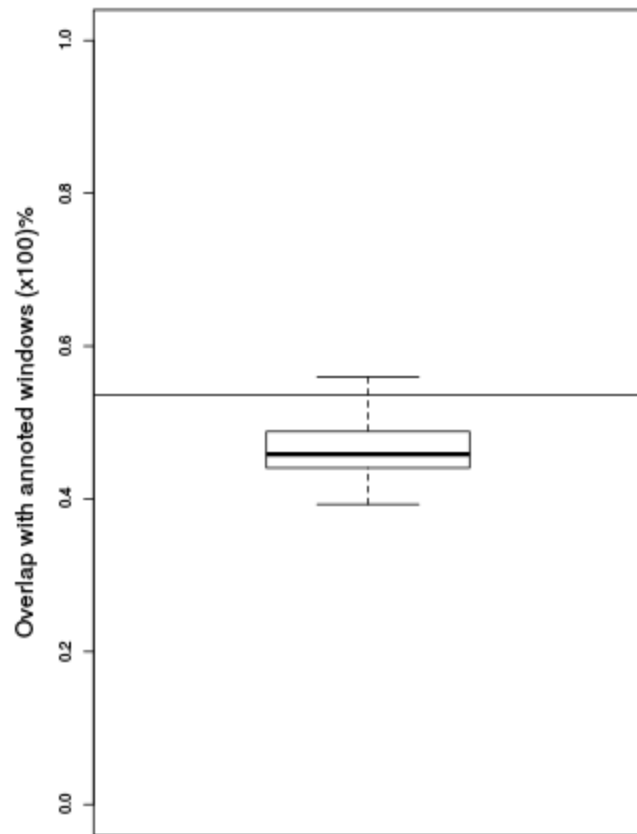

p-value= 0.01

Pongo\_pygmaeus Non protein coding windows

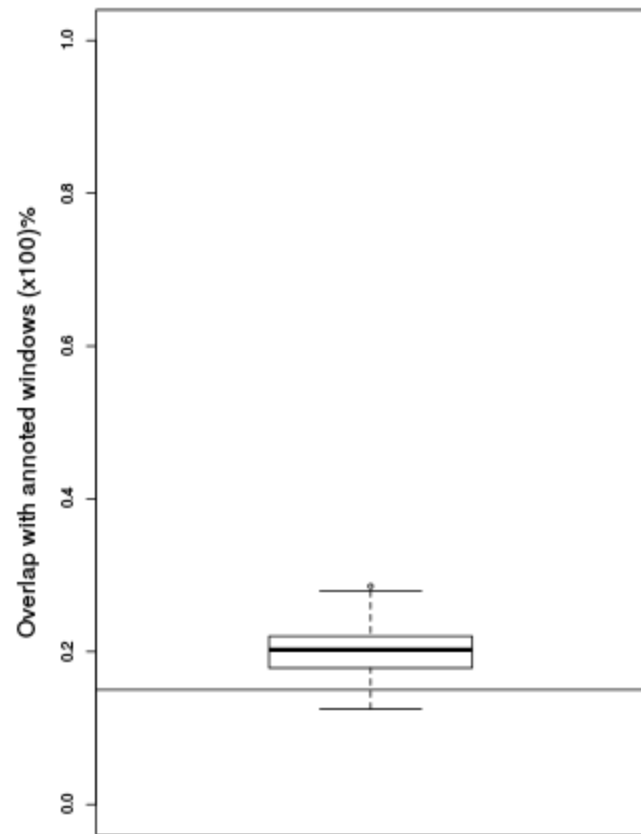

p-value= 0.9307
